# Supplementary material
Source: publisher site journal article supplement (https://www.spandidos-publications.com/2259/downloadSupplementary)

Figure S1. circHIPK3 is derived from exon 2 of linear HIPK3 as verified by an online software (CircPrimer; version 1.2). circ, circular RNA; HIPK3, homeodomain interacting protein kinase 3.

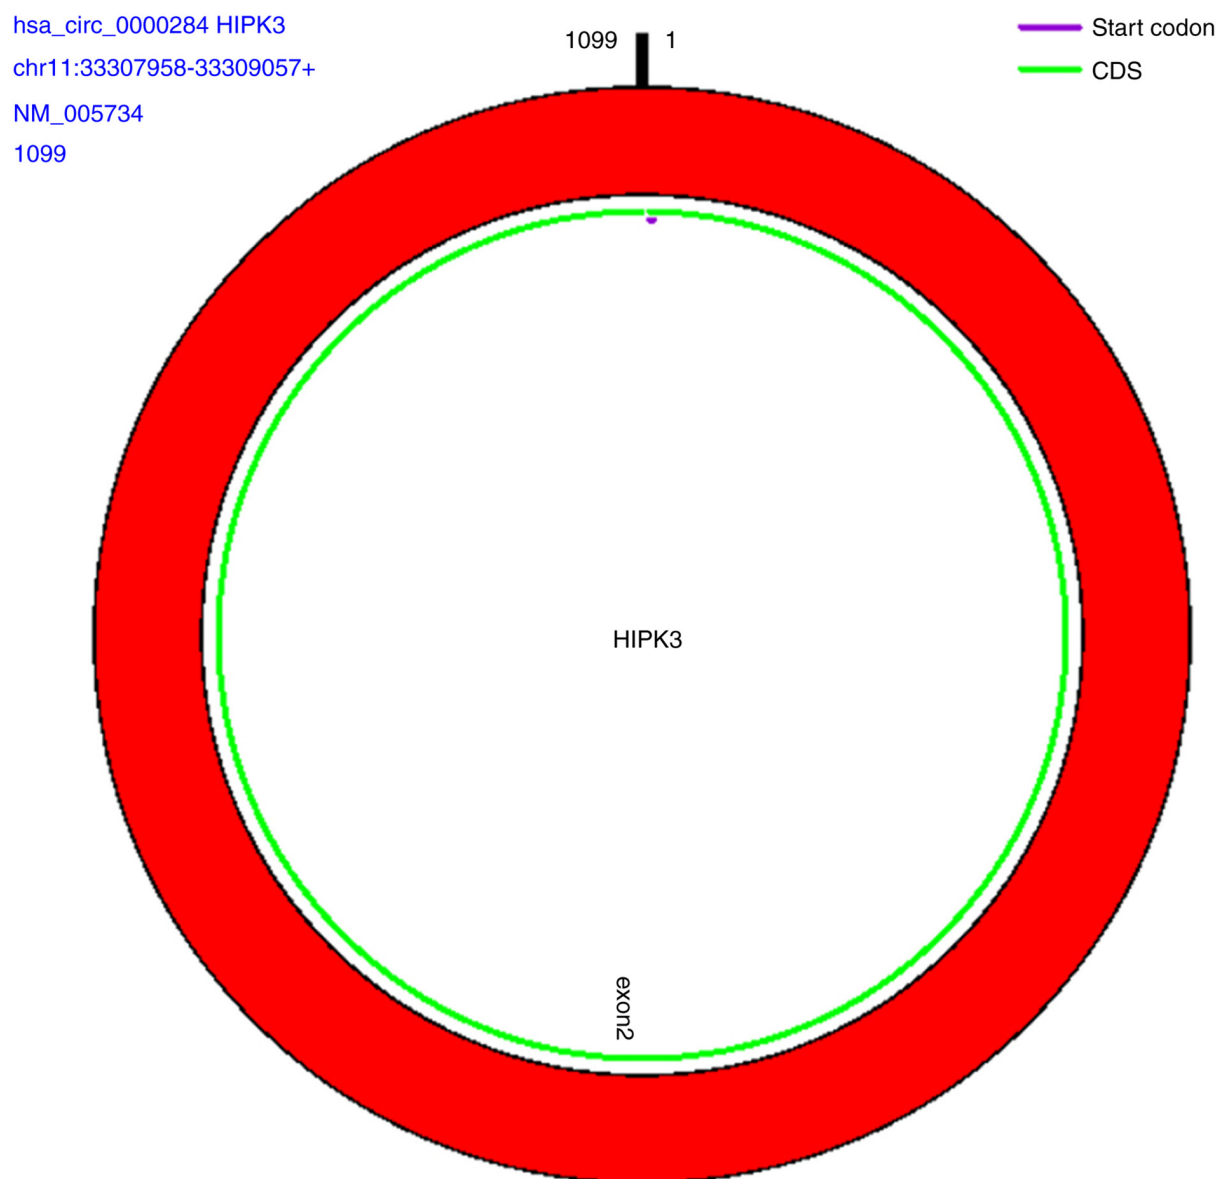

Figure S2. HDAC4 expression after different interventions. HDAC4 (A) mRNA and (B) protein expression was determined by RT-qPCR and western blotting after transfection of specific HDAC4 siRNAs (siHDAC4#1 and siHDAC4#2). siHDAC4#2 presented higher silencing efficacy, and thus, was selected as the silencing tool in subsequent HDAC4 RNA interference experiments. \* $P < 0.05$  and \*\* $P < 0.01$  vs. NC siRNA group. HDAC4 (C) mRNA and (D) protein expression was determined by RT-qPCR and western blotting after transfection of HDAC4 overexpression plasmids (oeHDAC4). \*\* $P < 0.01$  vs. vector group. All data are presented as the mean  $\pm$  SD of three independent experiments. HDAC4, histone deacetylase 4; NC, negative control; oe, overexpression; RT-qPCR, reverse transcription-quantitative PCR; siRNA, small interfering RNA.

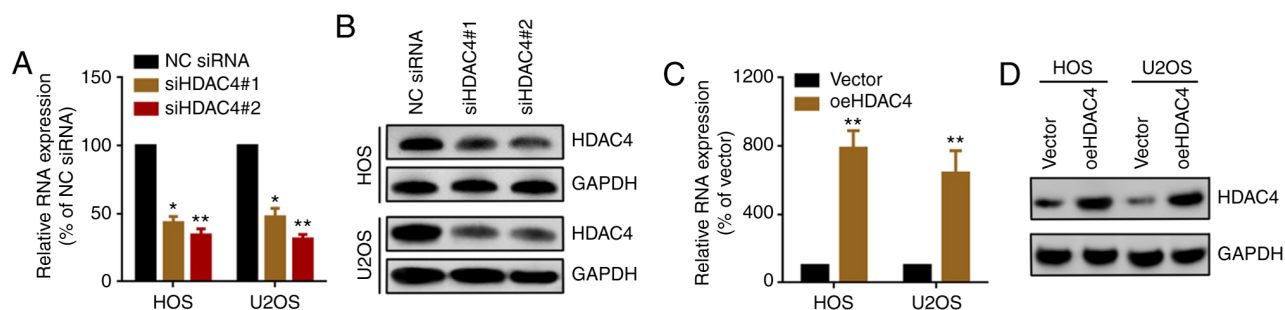

Supplement: Supplementary file 1 [file downloadSupplementary]
